# Supplementary material for: Polymer–nucleobase composites for chemotherapy drug capture
Source: Royal Society of Chemistry journal article supplement (doi:10.1039/d3tb00819c), 2023-01-01
Supplement: d3tb00819c1.pdf [file d3tb00819c1.pdf]

## Supporting Information

### Polymer–Nucleobase Composites for Chemotherapy Drug Capture

Gillian A. Su<sup>1</sup>, Ophelia J. Wadsworth<sup>1</sup>, H. Suzanne Muller<sup>1</sup>, William R. Archer<sup>1</sup>, Steven W. Hetts<sup>2</sup>, and Michael D. Schulz<sup>1\*</sup>

<sup>1</sup>Department of Chemistry and Macromolecules Innovation Institute,  
Virginia Tech, Blacksburg, VA 24061

<sup>2</sup>Departments of Radiology, Biomedical Imaging, and Neurological Surgery,  
University of California, San Francisco, CA 94143-0628

Correspondence to: [mdschulz@vt.edu](mailto:mdschulz@vt.edu)

### Table of Contents

|                                                                                                                   |           |
|-------------------------------------------------------------------------------------------------------------------|-----------|
| <b>Figure S1.</b> Illustration of DOX capture set-up                                                              | <b>S2</b> |
| <b>Figure S2.</b> FITR of PMAEG                                                                                   | <b>S2</b> |
| <b>Table S1.</b> Nucleobase content in each polymer composite                                                     | <b>S3</b> |
| <b>Figure S3.</b> CO <sub>2</sub> Adsorption of C-PMAEG and X-PMAEG at 22 °C                                      | <b>S3</b> |
| <b>Table S2.</b> Pore size of resins                                                                              | <b>S4</b> |
| <b>Figure S4.</b> DOX calibration plot using UV-Vis Spectroscopy                                                  | <b>S4</b> |
| <b>Figure S5.</b> Elution of Adenine from A-PMAEG over 20 minutes                                                 | <b>S5</b> |
| <b>Figure S6.</b> Xanthine, Adenine, Cytosine, and Thymine capture using X-R1, A-R1, C-R1, and T-R1, respectively | <b>S6</b> |
| <b>Table S3.</b> DOX capture 20, 50, 100 mg resin over 20 minutes                                                 | <b>S7</b> |

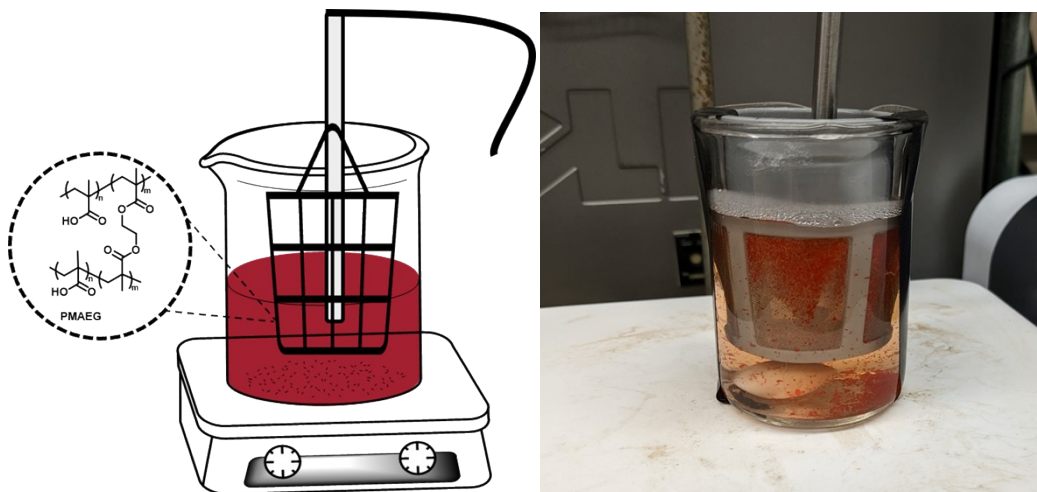

**Figure S1.** Illustration of DOX capture set-up using UV probe and filter. The polymer composites were stirred continually in DOX–PBS solution beneath the filter.

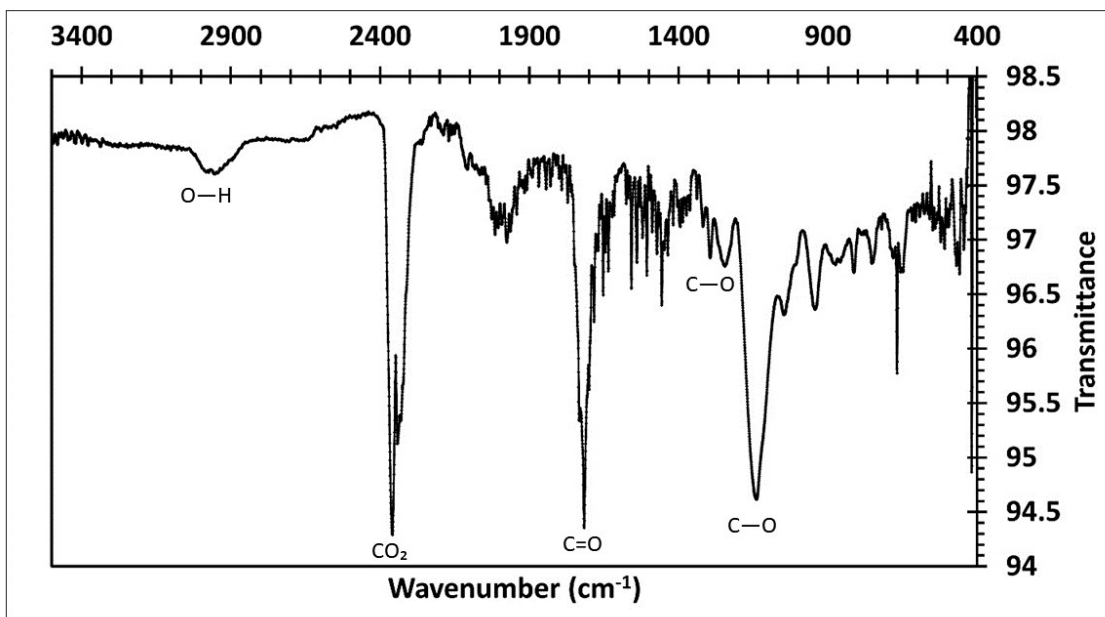

**Figure S2.** FTIR spectrum of PMAEG confirming successful incorporation of MA and EGDMA with vibration bands corresponding to the O—H, C=O, and C—O from MA and EGDMA

**Table S1.** Nucleobase content in each polymer composite. <sup>A</sup>: Weight percent of N obtained from elemental analysis duplicate of “As-synthesized” resins. <sup>B</sup>: Mass of nucleobase incorporated into polymer composite per gram of resin. <sup>C</sup>: Weight percent of N obtained from elemental analysis for “R-1” material conducted in duplicate.

| Nucleobase | %N <sup>A</sup> | %N <sup>A</sup> | mg of nucleobase incorporated per g of resin <sup>B</sup> | Nucleobase content in R1 Series |                 |
|------------|-----------------|-----------------|-----------------------------------------------------------|---------------------------------|-----------------|
|            |                 |                 |                                                           | %N <sup>C</sup>                 | %N <sup>C</sup> |
| Adenine    | 0.40            | 0.51            | 8.78                                                      | 0.08                            | 0.01            |
| Cytosine   | 3.85            | 4.19            | 106.34                                                    | 0.00                            | 0.00            |
| Thymine    | 0.46            | 0.70            | 26.12                                                     | 0.00                            | 0.00            |
| Xanthine   | 4.21            | 3.97            | 111.09                                                    | 0.00                            | 0.00            |

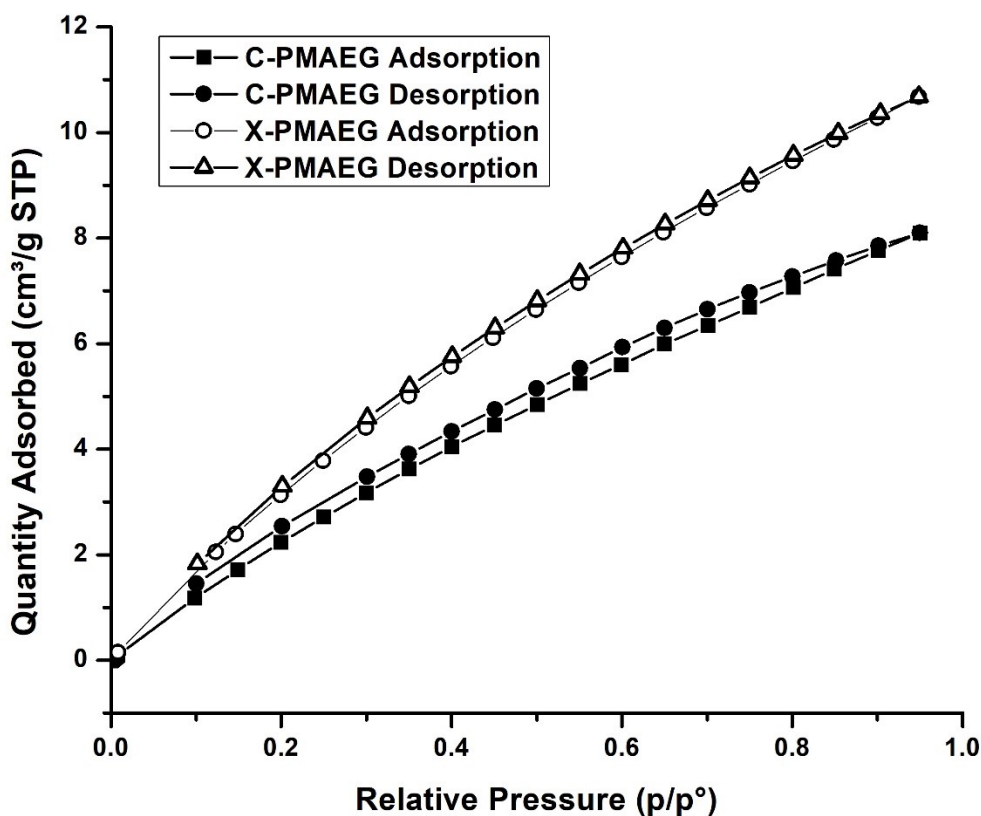

**Figure S3.** CO<sub>2</sub> Adsorption of C-PMAEG and X-PMAEG at 22°C

| Resin   | Pore Size (Å) |
|---------|---------------|
| PMAEG   | 6.4           |
| X-PMAEG | 6.0           |
| T-PMAEG | 6.1           |
| A-PMAEG | 6.8           |
| C-PMAEG | 5.9           |

**Table S2.** Median pore size of resins using CO<sub>2</sub> BET

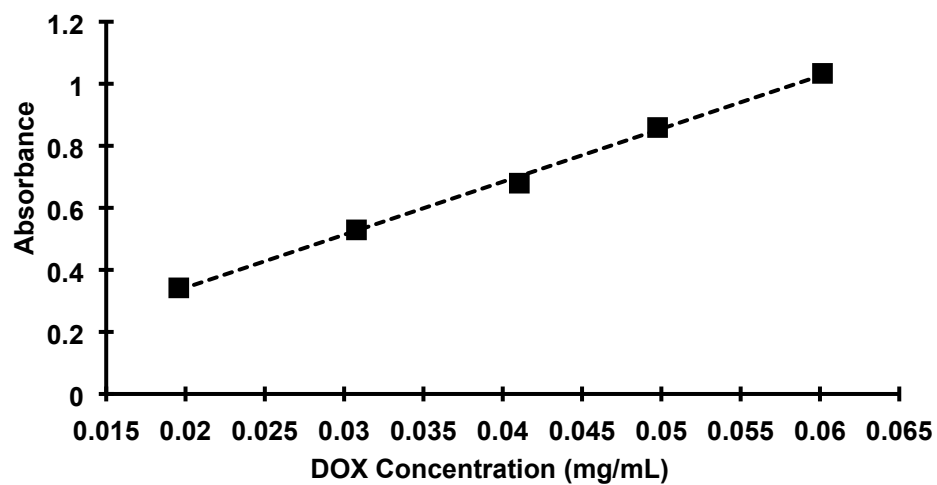

**Figure S4:** DOX calibration plot using UV-Vis Spectroscopy

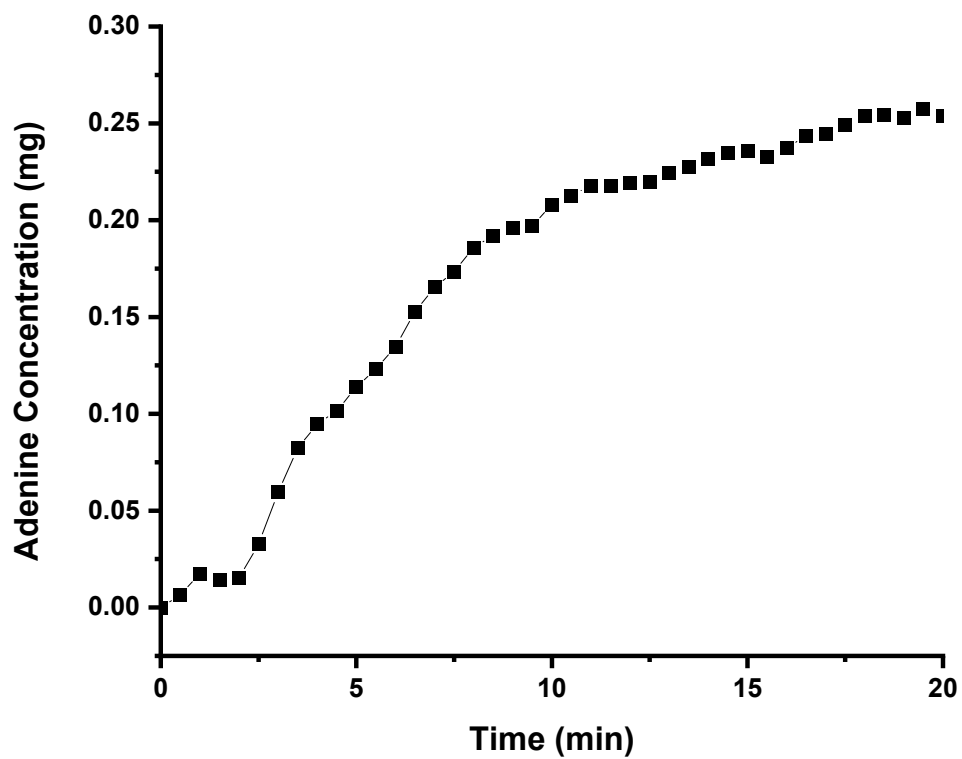

**Figure S5:** Elution of Adenine from A-PMAEG over 20 minutes

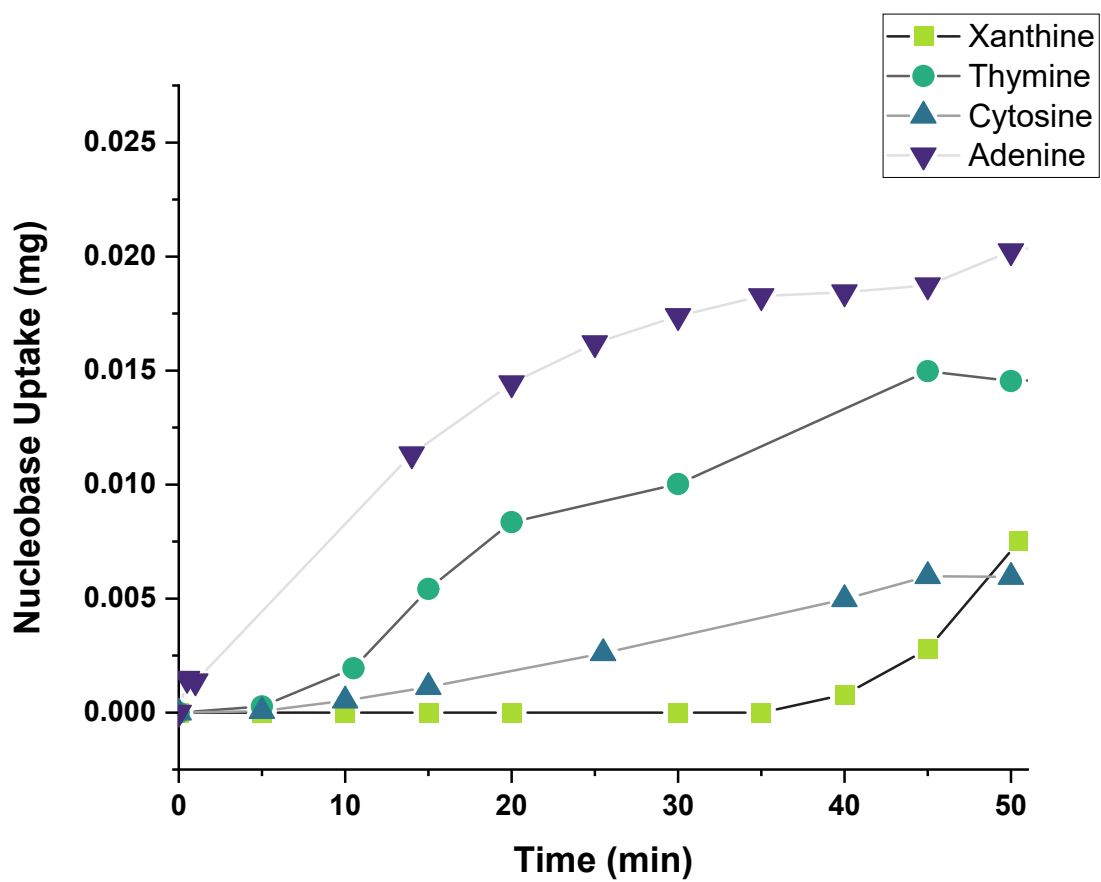

**Figure S6:** Xanthine, Adenine, Cytosine, and Thymine capture using X-R1, A-R1, C-R1, and T-R1, respectively

| <b>Time</b> | <b>20mg<br/>A-PMAEG<br/>(mg DOX captured/g of<br/>resin)</b> | <b>Std.<br/>Dev</b> | <b>50mg<br/>A-PMAEG<br/>(mg DOX captured/g of<br/>resin)</b> | <b>Std.<br/>Dev</b> | <b>100 mg<br/>A-PMAEG<br/>(mg DOX captured/g of<br/>resin)</b> | <b>Std.<br/>Dev</b> |
|-------------|--------------------------------------------------------------|---------------------|--------------------------------------------------------------|---------------------|----------------------------------------------------------------|---------------------|
| 0           | 0.00                                                         | 0.00                | 0.00                                                         | 0.00                | 0.00                                                           | 0.00                |
| 0.5         | 0.51                                                         | 1.22                | -0.40                                                        | 1.10                | 0.55                                                           | 4.17                |
| 1           | 0.43                                                         | 1.35                | 0.44                                                         | 1.82                | 2.11                                                           | 5.98                |
| 1.5         | 1.74                                                         | 1.89                | 2.29                                                         | 0.79                | 7.65                                                           | 6.24                |
| 2           | 2.61                                                         | 2.40                | 3.61                                                         | 1.01                | 14.14                                                          | 10.15               |
| 2.5         | 3.87                                                         | 3.39                | 5.80                                                         | 3.10                | 22.86                                                          | 6.64                |
| 3           | 4.54                                                         | 3.82                | 7.55                                                         | 3.85                | 25.30                                                          | 7.89                |
| 3.5         | 5.85                                                         | 3.30                | 10.00                                                        | 5.20                | 27.95                                                          | 9.08                |
| 4           | 6.99                                                         | 3.74                | 12.18                                                        | 4.59                | 32.71                                                          | 9.68                |
| 4.5         | 7.94                                                         | 4.73                | 14.71                                                        | 5.75                | 35.31                                                          | 7.05                |
| 5           | 9.01                                                         | 4.36                | 16.81                                                        | 6.68                | 35.03                                                          | 10.65               |
| 5.5         | 10.27                                                        | 3.06                | 19.04                                                        | 6.50                | 46.42                                                          | 10.50               |
| 6           | 10.94                                                        | 2.99                | 19.13                                                        | 5.56                | 47.79                                                          | 10.77               |
| 6.5         | 12.68                                                        | 2.43                | 21.26                                                        | 7.86                | 50.37                                                          | 9.59                |
| 7           | 13.40                                                        | 3.18                | 22.64                                                        | 7.74                | 52.00                                                          | 9.69                |
| 7.5         | 14.63                                                        | 2.88                | 23.60                                                        | 8.24                | 52.80                                                          | 10.53               |
| 8           | 15.42                                                        | 2.81                | 25.14                                                        | 9.00                | 54.42                                                          | 9.16                |
| 8.5         | 15.48                                                        | 3.58                | 26.39                                                        | 8.76                | 55.21                                                          | 9.91                |
| 9           | 16.29                                                        | 2.96                | 26.11                                                        | 8.56                | 55.43                                                          | 8.54                |
| 9.5         | 16.87                                                        | 3.27                | 26.72                                                        | 7.68                | 56.97                                                          | 8.24                |
| 10          | 17.71                                                        | 2.53                | 28.15                                                        | 9.63                | 58.44                                                          | 6.59                |
| 10.5        | 18.35                                                        | 2.53                | 27.76                                                        | 7.53                | 59.06                                                          | 6.26                |
| 11          | 18.69                                                        | 2.41                | 29.84                                                        | 10.36               | 59.34                                                          | 6.54                |
| 11.5        | 19.14                                                        | 2.22                | 31.33                                                        | 11.86               | 60.99                                                          | 6.12                |
| 12          | 18.73                                                        | 4.33                | 30.12                                                        | 9.71                | 61.07                                                          | 5.88                |
| 12.5        | 19.43                                                        | 3.08                | 30.16                                                        | 11.95               | 62.23                                                          | 6.12                |
| 13          | 19.87                                                        | 3.70                | 31.47                                                        | 10.32               | 62.15                                                          | 6.18                |
| 13.5        | 21.52                                                        | 3.48                | 32.22                                                        | 11.64               | 61.71                                                          | 5.70                |
| 14          | 21.70                                                        | 2.43                | 30.92                                                        | 9.97                | 62.88                                                          | 4.83                |
| 14.5        | 22.31                                                        | 4.03                | 32.55                                                        | 10.69               | 63.10                                                          | 6.16                |
| 15          | 21.59                                                        | 4.23                | 32.75                                                        | 10.16               | 62.15                                                          | 5.64                |
| 15.5        | 22.10                                                        | 3.99                | 32.76                                                        | 9.44                | 63.84                                                          | 4.98                |
| 16          | 22.11                                                        | 4.84                | 33.12                                                        | 8.38                | 63.10                                                          | 5.60                |
| 16.5        | 22.99                                                        | 5.21                | 33.97                                                        | 8.65                | 62.14                                                          | 6.21                |
| 17          | 23.48                                                        | 5.19                | 35.59                                                        | 10.63               | 62.19                                                          | 5.83                |
| 17.5        | 23.25                                                        | 5.39                | 36.59                                                        | 10.81               | 62.06                                                          | 5.70                |
| 18          | 23.74                                                        | 5.44                | 36.83                                                        | 11.55               | 62.16                                                          | 5.75                |
| 18.5        | 24.60                                                        | 5.38                | 37.06                                                        | 11.03               | 61.89                                                          | 5.70                |
| 19          | 23.95                                                        | 6.50                | 38.04                                                        | 10.71               | 61.06                                                          | 5.88                |
| 19.5        | 23.77                                                        | 7.57                | 40.38                                                        | 13.41               | 62.12                                                          | 5.33                |
| 20          | 23.73                                                        | 8.19                | 39.91                                                        | 10.37               | 61.64                                                          | 5.89                |

**Table S4.** DOX capture of 20, 50, 100 mg resin over 20 minutes
